# Supplementary material
Source: PubMed Central journal article supplement (PMC9125436)
Supplement: sj-pdf-1-inc-10.1177_1751143720988706.pdf [file sj-pdf-1-inc-10.1177_1751143720988706.pdf]

## Supplementary material

### INTERMACS profiles

| Profile                                                           | Description                                                                                                                                                                            |
|-------------------------------------------------------------------|----------------------------------------------------------------------------------------------------------------------------------------------------------------------------------------|
| 1. Severe cardiogenic shock ("crash and burn")                    | Haemodynamic instability in spite of increasing doses of catecholamines and/or mechanical circulatory support with critical hypoperfusion of target organs (severe cardiogenic shock). |
| 2. Progressive decline despite inotropes ("sliding on inotropes") | Deteriorating on intravenous inotropic support with worsening organ function and signs of congestion.                                                                                  |
| 3. Stable but inotrope dependent ("dependent stability")          | Haemodynamic stability with low or intermediate doses of inotropics, but necessary due to hypotension, worsening of symptoms, or progressive renal failure.                            |
| 4. Resting symptoms ("frequent flyer")                            | Temporary cessation of inotropic treatment is possible, but patient presents with frequent symptom recurrences and typically with fluid overload.                                      |
| 5. Exertion intolerant ("housebound")                             | Complete cessation of physical activity, stable at rest, but frequently with moderate fluid retention and some level of renal dysfunction.                                             |
| 6. Exertion limited ("walking wounded")                           | Minor limitation on physical activity and absence of congestion while at rest. Easily fatigued by light activity.                                                                      |
| 7. Ambulant heart failure                                         | NYHA class III with no current or recent decompensation                                                                                                                                |
